# Supplementary material for: Real-World Outcomes of Individualized Targeted Therapy with Insulin Glargine 300 Units/mL in Insulin-Naïve Korean People with Type 2 Diabetes: TOBE Study
Source: Springer Nature journal article supplement (doi:10.1007/s12325-024-02830-z), 2024-03-21
Supplement: MOESM1 [file 26888530]

1 **Real-world outcomes of individualized targeted therapy with insulin glargine**  
2 **300 units/mL in insulin-naïve Korean people with type 2 diabetes: TOBE study**

3

4 Eun-Gyoung Hong<sup>1</sup>, Kyung-Wan Min<sup>2</sup>, Jung Soo Lim<sup>3</sup>, Kyu-Jeung Ahn<sup>4</sup>, Chul Woo Ahn<sup>5</sup>,  
5 Jae-Myung Yu<sup>6</sup>, Hye-Soon Kim<sup>7</sup>, Hyun Jin Kim<sup>8</sup>, Won Kim<sup>9</sup>, Dong Han Kim<sup>9</sup>, Hak Chul  
6 Jang<sup>10</sup>

7

8 <sup>1</sup>Department of Internal Medicine, Hallym University Dongtan Sacred Heart Hospital,  
9 Hallym University College of Medicine, Hwaseong, South Korea

10 <sup>2</sup>Department of Internal Medicine, Eulji General Hospital, Eulji University School of  
11 Medicine, Daejeon, South Korea

12 <sup>3</sup>Department of Internal Medicine, Wonju Severance Christian Hospital, Yonsei University  
13 Wonju College of Medicine, Wonju, South Korea

14 <sup>4</sup>Division of Endocrinology and Metabolism, Kyung Hee University Hospital at Gangdong,  
15 Kyung Hee University School of Medicine, Seoul, South Korea

16 <sup>5</sup>Department of Internal Medicine, Gangnam Severance Hospital, Yonsei University  
17 College of Medicine, Seoul, South Korea

18 <sup>6</sup>Department of Internal Medicine, Hallym University Kangnam Sacred Heart Hospital,  
19 Hallym University College of Medicine, Seoul, South Korea

20 <sup>7</sup>Division of Endocrinology, Department of Internal Medicine, Keimyung University  
21 School of Medicine, Daegu, South Korea

22 <sup>8</sup>Department of Internal Medicine, Chungnam National University Hospital, Chungnam  
23 National University College of Medicine, Daejeon, South Korea

24 <sup>9</sup>Medical Department, Sanofi Korea, Seoul, South Korea

25 <sup>10</sup>Department of Internal Medicine, Seoul National University Bundang Hospital, Seoul

26 National University College of Medicine, Seongnam, South Korea

27

28 Corresponding author:

29 Hak Chul Jang MD, PhD

30 Department of Internal Medicine, SNU Bundang Hospital

31 Seoul National University College of Medicine

32 82, Gumi-ro, 173-beon-gil, Bundang-gu, Seongnam-si

33 Gyeonggi-do, 13620, South Korea

34 E-mail: janghak@snu.ac.kr

35

36 **Supplementary files**37 **Table S1 Institutional Review Board of the study with their reference numbers**

| #  | Institutional Review Board (IRB)                                                      | IRB ID               |
|----|---------------------------------------------------------------------------------------|----------------------|
| 1  | Kyung Hee University Hospital at Gangdong Institutional Review Board                  | KHNMC 2016-05-005    |
| 2  | Keimyung University Dongsan Hospital Institutional Review Board                       | DSMC 2016-04-040-001 |
| 3  | Keimyung University Dongsan Hospital Institutional Review Board                       | DSMC 2016-04-041     |
| 4  | Inje University Busan Paik Hospital Institutional Review Board                        | 16-0121              |
| 5  | Dankook University Hospital Institutional Review Board                                | 2016-06-012-021      |
| 6  | Seoul National University Bundang Hospital Institutional Review Board                 | B-1607-356-302       |
| 7  | Myongji Hospital Institutional Review Board                                           | 2016-01-067          |
| 8  | Wonju Severance Christian Hospital Institutional Review Board                         | 2019-03-0138         |
| 9  | Wonju Severance Christian Hospital Institutional Review Board                         | 2016-06-0012         |
| 10 | Gachon University Gil Medical Center Institutional Review Board                       | GAIRB2016-251        |
| 11 | Ajou University Hospital Institutional Review Board                                   | AJIRB-MED-OBS-16     |
| 12 | Hallym University Kangnam Sacred Heart Hospital Institutional Review Board            | HKS 2016-09-125-014  |
| 13 | Hallym University Dongtan Sacred Heart Hospital Institutional Review Board            | HDT 2016-09-412-007  |
| 14 | Gangnam Severance Hospital Institutional Review Board                                 | 3-2016-0265          |
| 15 | The Catholic University of Korea St. Vincent's Hospital Institutional Review Board    | VC16MSME0244         |
| 16 | The Catholic University of Korea Seoul St. Mary's Hospital Institutional Review Board | KC16MSME1037         |
| 17 | Pusan National University Hospital Institutional Review Board                         | 1701-005-061         |
| 18 | Busan St. Mary's Hospital Institutional Review Board                                  | BSM2017-01           |
| 19 | Kosin University Gospel Hospital Institutional Review Board                           | 2016-12-013          |
| 20 | Chuncheon Sacred Heart Hospital Institutional Review Board                            | 2017-01-004          |
| 21 | Ulsan University Hospital Institutional Review Board                                  | 2017-02-003-031      |
| 22 | Chungnam National University Hospital Institutional Review Board                      | 2017-02-023          |
| 23 | Soon Chun Hyang University Hospital Institutional Review Board                        | 2017-02-016-009      |
| 24 | Kyungpook National University Chilgok Hospital Institutional Review Board             | 2017-03-011          |

|    |                                                                                         |              |
|----|-----------------------------------------------------------------------------------------|--------------|
| 25 | Inje University Seoul Paik Hospital Institutional Review Board                          | 2017-03-007  |
| 26 | Dongguk University Ilsan Hospital Institutional Review Board                            | 2017-01-059  |
| 27 | Inje University Ilsan Paik Hospital Institutional Review Board                          | 2017-04-027  |
| 28 | The Catholic University of Korea Incheon St. Mary's Hospital Institutional Review Board | OC17OODI0094 |
| 29 | Daejeon Eulji Medical Center Institutional Review Board                                 | 2017-09-022  |

39 **FIGURE S1** Participants disposition

40

41

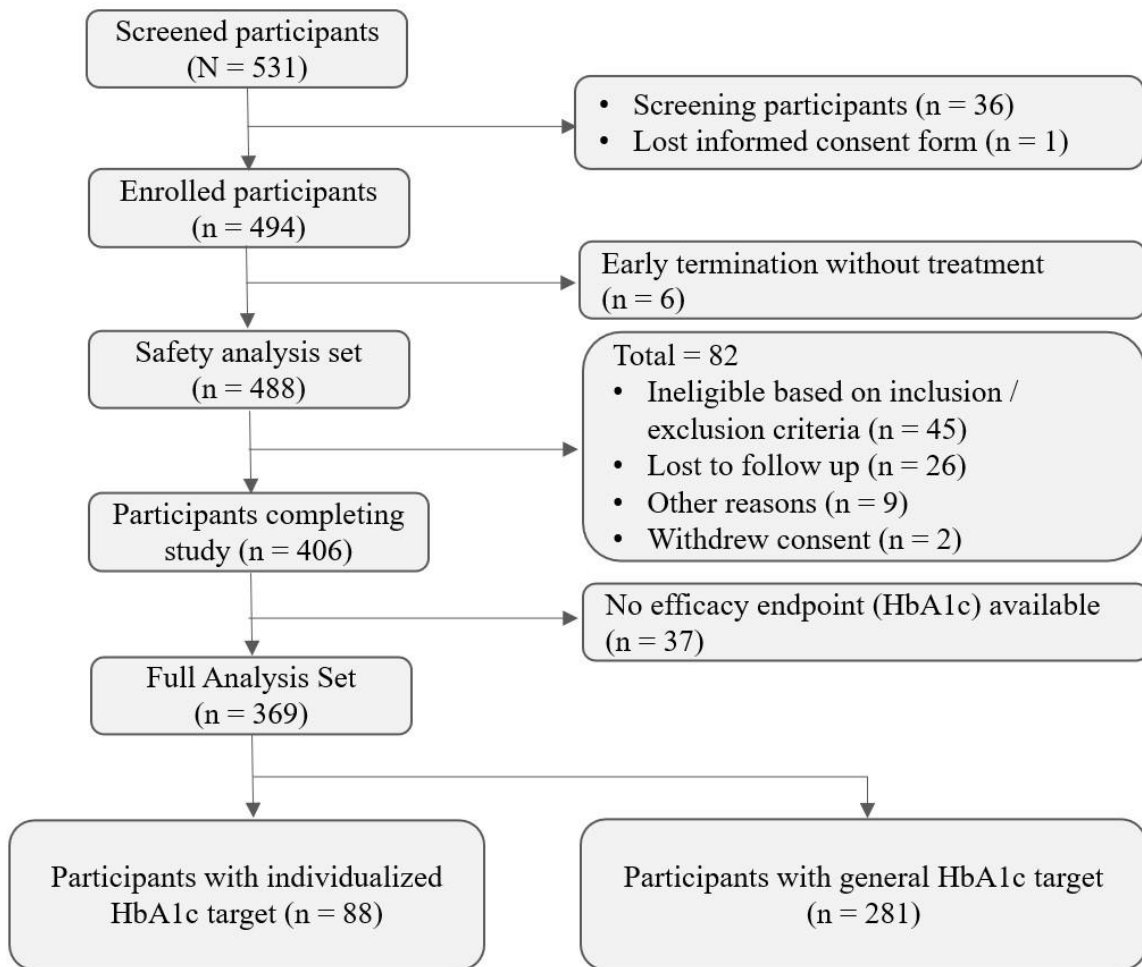

42

43 Abbreviation: HbA1c, glycated hemoglobin.

44

45 **TABLE S2** General baseline demographics and clinical characteristics (full analysis set) of groups

46

| Variable                                       | Individualized           | General                   | <i>P</i> value <sup>a</sup> | Total<br>(N = 369) |
|------------------------------------------------|--------------------------|---------------------------|-----------------------------|--------------------|
|                                                | target group<br>(n = 88) | target group<br>(n = 281) |                             |                    |
| Age, years                                     | 61.9 ± 11.3              | 59.7 ± 11.4               | 0.0910                      | 60.2 ± 11.4        |
| Male sex, n (%)                                | 58 (65.9)                | 149 (53.0)                | 0.0336 <sup>a</sup>         | 207 (56.1)         |
| Duration of T2DM, years                        | 11.8 ± 8.4               | 12.4 ± 7.6                | 0.3165                      | 12.3 ± 7.8         |
| Body weight, kg                                | 66.9 ± 11.5              | 65.3 ± 11.6               | 0.1237                      | 65.7 ± 11.5        |
| Body mass index, kg/m <sup>2</sup>             | 24.9 ± 3.7               | 24.9 ± 3.5                | 0.9463                      | 24.9 ± 3.5         |
| HbA1c, %                                       | 9.8 ± 1.7                | 9.9 ± 1.6                 | 0.3066                      | 9.9 ± 1.6          |
| Number of prior diabetic<br>medications, n (%) |                          |                           |                             |                    |
| 1                                              | 17 (19.3)                | 57 (20.3)                 |                             | 74 (20.1)          |
| 2                                              | 37 (42.1)                | 125 (44.5)                |                             | 162 (43.9)         |
| 3                                              | 34 (38.6)                | 99 (35.2)                 |                             | 133 (36.0)         |

|                                                 |           |            |        |            |
|-------------------------------------------------|-----------|------------|--------|------------|
| Diabetes complication <sup>b</sup> , n (%)      | 18 (20.5) | 109 (38.8) | 0.0016 | 127 (34.4) |
| Comorbidity <sup>c</sup> , n (%)                | 81 (92.1) | 264 (94.0) | 0.5272 | 345 (93.5) |
| Severe hypoglycemia<br>within previous 6 months | 1 (1.1)   | 2 (0.7)    | 0.5595 | 3 (0.8)    |

---

47 *Note:* Values are presented as number (%) or mean ± standard deviation.

48 Abbreviations: HbA1c, glycated hemoglobin; T2DM, type 2 diabetes mellitus.

49 <sup>a</sup>*P* value calculated by comparing individualized and general HbA1c target groups; *P* <0.05. There was no statistically significant  
50 difference except for Male sex, n (%)

51 <sup>b</sup>Participants with at least one diabetes complication.

52 <sup>c</sup>Participants with at least one comorbidity.

53 *P* value calculated by comparing in each group participants achieving and not achieving target.

54

55 **TABLE S3**    **Change in proportion of participants taking concomitant diabetic medications before and after Gla-300**  
 56 **treatment**

| Drug class          | Individualized target group |       |        | General target group |       |        | <i>P</i> value <sup>b</sup> | Total population |       |        |
|---------------------|-----------------------------|-------|--------|----------------------|-------|--------|-----------------------------|------------------|-------|--------|
|                     | (n = 88)                    |       |        | (n = 281)            |       |        |                             | (N = 369)        |       |        |
|                     | Before                      | After | Change | Before               | After | Change |                             | Before           | After | Change |
| Metformin           | 84.1                        | 83.0  | -1.1   | 80.8                 | 77.6  | -3.2   | 0.4412                      | 81.6             | 78.9  | -2.7   |
| DPP-4i              | 77.3                        | 71.6  | -5.7   | 69.8                 | 67.3  | -2.5   | 0.4397                      | 71.5             | 68.3  | -3.3   |
| SU                  | 60.2                        | 33.0  | -27.3  | 65.5                 | 45.6  | -19.9  | 0.2988                      | 64.2             | 42.5  | -21.7  |
| SGT2i               | 2.3                         | 2.3   | 0      | 8.5                  | 7.1   | -1.4   | 0.1493                      | 7.0              | 6.0   | -1.1   |
| TZD                 | 14.8                        | 8.0   | -6.8   | 11.4                 | 5.7   | -5.7   | 0.5778                      | 12.2             | 6.2   | -6.0   |
| AGi                 | 2.3                         | 2.3   | 0      | 1.1                  | 1.4   | 0.4    | 0.6760                      | 1.4              | 1.6   | 0.3    |
| Others <sup>a</sup> | 0.0                         | 5.7   | 5.7    | 1.4                  | 11.7  | 10.3   | NC <sup>c</sup>             | 1.1              | 10.3  | 9.2    |

57 Abbreviations: AGi; alpha-glucosidase inhibitor; DPP-4i, dipeptidyl peptidase-4 inhibitor; Gla-300, insulin glargine 300

58 Units/mL; SGLT2i, sodium glucose cotransporter-2 inhibitor; SU, sulfonylurea; TZD, thiazolidinedione; NC, Not Calculated.

59 <sup>a</sup>Glucagon-like peptide-1 receptor agonist, short-acting insulin, premixed insulin, meglitinide. <sup>b</sup>Test for between-group difference



60 (individualized versus general HbA1c target group) using generalized estimating equation method. †Not calculated because one  
61 of the variables contained 0.
